# Supplementary material for: S-doped Fe single atoms as efficient peroxidase-like nanozymes for colorimetric detection of oxytetracycline
Source: Royal Society of Chemistry journal article supplement (doi:10.1039/d5cc06803g), 2026-01-01
Supplement: d5cc06803g1.pdf [file d5cc06803g1.pdf]

## Supporting information

### **S doped Fe single atom as efficient peroxidase-like nanozymes for colorimetric detection of oxytetracycline**

Jianping Guan<sup>1, #</sup>, Tianyu Tao<sup>1, #</sup>, Nianhui Zhou<sup>1</sup>, Xu Liu<sup>1</sup>, Jinhua Hu<sup>1</sup>, Chenyang Huang<sup>1</sup>, Yunhu Han<sup>2</sup>, Tao Gan<sup>3, \*</sup>, and Yu Xiong<sup>1, \*</sup>

#### AUTHOR ADDRESS

<sup>1</sup> College of Chemistry and Chemical Engineering, Central South University, Changsha 410083, China.

<sup>2</sup> State Key Laboratory of Flexible Electronics, School of Chemistry and Life Sciences, Nanjing University of Posts and Telecommunications, Nanjing, China.

<sup>3</sup> Shanghai Synchrotron Radiation Facility, Shanghai Advanced Research Institute, Chinese Academy of Sciences, Shanghai 201204, China.

<sup>#</sup> These authors contribute equally to the work

<sup>\*</sup> To whom correspondence should be addressed. E-mail: [thomas153@126.com](mailto:thomas153@126.com), [gant@sari.ac.cn](mailto:gant@sari.ac.cn)

## 1. Materials and Instruments

### 1.1 Reagents and materials

Iron acetylacetonate  $\text{Fe}(\text{acac})_3$ , Zinc (II) nitrate hexahydrate  $(\text{Zn}(\text{NO}_3)_2 \cdot 6\text{H}_2\text{O})$  and 2-methylimidazole (2-MIM), oxytetracycline (OTC) were purchased from Alfa Aesar Chemical Co., Diphenyl disulfide and 3,3',5,5'-tetramethylbenzidine (TMB), Tannic acid (TA), Diphenylditelluride were purchased from Energy Chemical, Levofloxacin, Penicillin, Meropenem, Azithromycin, Enrofloxacin, Ampicillin, Roxithromycin, Fosfomycin, Metronidazole, Cefoxitin, Amoxicillin, Chloramphen, Sulfadiazine, Acetic Acid, Sodium acetate, methanol, isopropanol (IPA) p-benzoquinone (PBQ), and , L-histidine (His) 5,5-Dimethyl-1-pyrrolineN-oxide (DMPO), and ethanol were purchased at the Shanghai Sinopharm Chemical Reagent Co. Shanghai Sinopharm Group Chemical Reagent Company. All chemicals were analytical grade and directly used without further purification. Solutions were prepared with ultrapure water from Millipore Milli-Q water purification system (Billerica, MA).

### 1.2 Instruments

The particle morphology observation primarily relied on the JEM-F200 scanning transmission electron microscope working at 200 kV. , whose STEM mode provides a resolution better than 0.16 nm. Regarding the detection limit for particle identification, we define it as the minimum particle size that can be reliably recognized and statistically analyzed under specific imaging and analytical conditions. For morphological identification, considering limitations in signal-to-noise ratio and contrast, we set the lower size limit for statistical analysis at 2 nm, which is significantly higher than the theoretical instrumental resolution, to ensure statistical reliability. For compositional identification, the energy-dispersive X-ray spectroscopy (EDS) system used typically has an elemental detection limit in the range of 0.1–0.5 wt.% (depending on the specific element), which ensures the accuracy of the compositional analysis for the particles examined. Aberration corrected high-angle annular dark-field scanning TEM (AC-HAADF STEM) images were taken on a JEM-ARM200F atomic-resolution analytical microscope operated at 300 kV. X-ray diffraction (XRD) patterns were recorded using a Rigaku MiniFlex600 X-ray powder diffractometer with

monochromatized Cu K $\alpha$  radiation ( $\lambda = 1.5406 \text{ \AA}$ ). Fe K-edge XAFS measurements of Fe<sub>1</sub>/SCN were carried out at the 1W1B station in Beijing Synchrotron Radiation Facility (BSRF, 2.5 GeV, 250 mA maximum, Si(111) double crystals monochromator). The XAFS raw data was background-subtracted, normalized and Fourier-transformed by standard procedures with the ATHENA program. Nitrogen adsorption and desorption experiments were carried out on an Autosorb iQ2 adsorptometer (Quantachrome Instruments) at 77 K, and specific surface areas were calculated through Langmuir equation. Pore size distribution was estimated from the adsorption branch of the isotherm by the nonlocal density-functional theory (NLDFT) method. XPS spectra were performed by a Thermo Fisher ESCALAB Scientific ESCALAB 250Xi XPS System. V-vis absorption spectra were recorded with a UV-2600 spectrophotometer (Shimadzu, Japan).

## **2. Experiment Section**

### **2.1 Synthesis of H-ZIF-8**

In a typical synthesis, 1.192 g of Zn(NO<sub>3</sub>)<sub>2</sub>·6H<sub>2</sub>O was dissolved in 30 mL of methanol, and the resulting solution was added to 15 mL of methanol containing 1.314 g of 2-methylimidazole. The mixture was stirred at room temperature for 1 hour, transferred to a Telfon-lined stainless-steel autoclave, and maintained at 120°C for 4 hours. After cooling to room temperature, the solid product was collected by centrifugation. The dried solid was then dissolved in methanol, followed by the addition of a 30 g/L tannic acid solution. The mixture was stirred for 50 minutes, after which the solid product was isolated again by centrifugation. Finally, the product was dried overnight in an 80°C vacuum oven to yield the final material.

### **2.2 Synthesis of CN and SCN**

CN was derived from H-ZIF-8 powder via pyrolysis at 950 °C for 3 h under a N<sub>2</sub> atmosphere, employing a heating rate of 5 °C min<sup>-1</sup>. The SCN material was obtained by annealing a ground mixture of CN (25 mg) and diphenyl disulfide (1 mg) at 950 °C for 2 h under N<sub>2</sub> flow (5 °C min<sup>-1</sup>).

### 2.3 Preparation of Fe<sub>1</sub>/SCN and Fe<sub>1</sub>/CN

The Fe<sub>1</sub>/SCN material was obtained by annealing a ground mixture of CN (25 mg), iron acetylacetonate (2 mg), and diphenyl disulfide (1 mg) at 950 °C for 2 h under N<sub>2</sub> flow (5 °C min<sup>-1</sup>).<sup>[1,2]</sup> The reference Fe<sub>1</sub>/CN material was prepared under identical conditions in the absence of diphenyl disulfide.

### 2.4 Investigation of Peroxidase-like Activity

The peroxidase-like activity of Fe<sub>1</sub>/SCN was systematically evaluated across a range of pH and temperature conditions using H<sub>2</sub>O<sub>2</sub> and TMB as chromogenic substrate. To investigate the effect of pH on the catalytic activity of nanoenzymes, the reaction mixture consisted of 1940 µL of 0.2 M acetate buffer (pH 3.0–7.0), 20 µL of 20 mM TMB, 20 µL of 200 mM H<sub>2</sub>O<sub>2</sub>, and 20 µL of Fe<sub>1</sub>/SCN suspension (1 mg/mL). After incubation at 25°C for 5 min in the dark, the absorbance was measured at 652 nm using a UV–visible spectrophotometer.

Building on the identified optimal pH profile, we further examined how temperature modulates the catalytic performance of Fe<sub>1</sub>/SCN. Reaction mixtures containing Fe<sub>1</sub>/SCN, TMB, H<sub>2</sub>O<sub>2</sub>, and acetate buffer (pH 4.0) were incubated in the dark across a temperature gradient (10-80°C). The resulting absorbance at 652 nm was used to establish the optimal pH-temperature combination for maximum catalytic efficiency.

A series of control experiments were conducted by varying the concentrations of TMB or H<sub>2</sub>O<sub>2</sub> across specified concentration ranges, with all other experimental parameters held constant. The Michaelis constant ( $K_m$ ) and maximum reaction rate ( $V_{max}$ ) were determined from the Lineweaver-Burk plot using the transformed Michaelis-Menten equation:  $1/V = K_m/V_{max} \times (1/[S] + 1/K_m)$ .

### 2.5 Specific activity calculation

The specific activity (SA) of three catalysts were confirmed by the color change of TMB. Different concentrations of three catalysts were added to the mixed system containing TMB (20 mM), and the final system was adjusted to 1.5 mL.

**Calculate the nanozyme activity (units) using the following equation:**

$$b_{\text{nanozyme}} = V / (\epsilon \times l) \times (\Delta A / \Delta t) \quad (2)$$

where  $b_{\text{nanozyme}}$  is the catalytic activity of nanozyme expressed in units. One unit is

defined as the amount of nanozyme that catalytically produces 1  $\mu\text{mol}$  of product per min at room temperature;  $V$  is the total volume of reaction solution ( $\mu\text{L}$ );  $\varepsilon$  is the molar absorption coefficient of the colorimetric substrate, which is maximized at  $39,000 \text{ M}^{-1} \text{ cm}^{-1}$  at 652 nm for TMB;  $l$  is the path length of light traveling in the cuvette (cm);  $A$  is the absorbance after subtraction of the blank value; and  $\Delta A/\Delta t$  is the initial rate of change in absorbance at  $652 \text{ nm min}^{-1}$ .

Calculate the SA of the  $\text{Fe}_1/\text{CN}$ , and  $\text{Fe}_1/\text{SCN}$  ( $\text{U mg}^{-1}$ ) by

$$\text{SA} = b_{\text{nanozyme}} / [\text{m}] \quad (3)$$

where SA is the specific activity expressed in units per milligram ( $\text{U mg}^{-1}$ ) nanozymes, and  $[\text{m}]$  is the nanozyme weight (mg) of each assay.

## 2.6 Colorimetric determination of OTC

Leveraging the peroxidase-like activity of  $\text{Fe}_1/\text{SCN}$  toward the TMB– $\text{H}_2\text{O}_2$  system, a colorimetric method was developed for the visual and quantitative detection of oxytetracycline (OTC). All detection procedures were performed under previously optimized catalytic conditions. Specifically,  $\text{Fe}_1/\text{SCN}$  and OTC at varying concentrations (0–30  $\mu\text{M}$ ) were mixed with 1930  $\mu\text{L}$  of sodium acetate buffer and incubated for 10 min at room temperature. Then, 20  $\mu\text{L}$  of  $\text{H}_2\text{O}_2$  and 20  $\mu\text{L}$  of TMB solution were sequentially introduced into the mixture. After 5 min of reaction in the dark, the absorbance at 652 nm was recorded.

Based on the experimental results, we observed a progressive fading of the blue coloration with increasing oxytetracycline (OTC) concentration, demonstrating that OTC effectively suppresses the catalytic activity of  $\text{Fe}_1/\text{SCN}$ . The degree of suppression is positively correlated with the OTC concentration. We quantified this inhibitory effect by measuring absorbance changes using UV-vis spectroscopy. The establishment of a linear calibration curve relating absorbance variation to OTC concentration enabled determination of the limit of detection (LOD), thereby achieving sensitive quantification of OTC.

## 2.7 Anti-Interference and selectivity experiment

To evaluate the selectivity of the  $\text{Fe}_1/\text{SCN}/\text{TMB}-\text{H}_2\text{O}_2$  system for OTC detection, the following experiment was conducted: identical concentrations (10  $\mu\text{M}$ ) of OTC and

13 other antibiotics (Levofloxacin, Penicillin, Meropenem, Azithromycin, Enrofloxacin, Ampicillin, Roxithromycin, Fosfomycin, Metronidazole, Cefoxitin, Amoxicillin, Chloramphen, Sulfadiazine) were separately mixed with 20  $\mu\text{L}$  of  $\text{Fe}_1/\text{SCN}$  (1 mg/mL) in 1930  $\mu\text{L}$  of sodium acetate buffer (200 mM, pH = 4) and incubated at room temperature for 10 min. Subsequently, 20  $\mu\text{L}$  of  $\text{H}_2\text{O}_2$  (200 mM) and 20  $\mu\text{L}$  of TMB (20 mM) solution were added sequentially, resulting in a total reaction volume of 2 mL. After reacting in the dark for 5 min, the absorbance at 652 nm were determined.

To investigate the potential interference effects of coexisting substances on OTC detection, 20  $\mu\text{M}$  of each of the other 13 antibiotics was individually added to a 10- $\mu\text{M}$  OTC solution. Subsequently, 20  $\mu\text{L}$  of  $\text{Fe}_1/\text{SCN}$  (1 mg/mL) was introduced into the mixture, followed by the addition of 1930  $\mu\text{L}$  of sodium acetate buffer (200 mM, pH = 4). After incubating at room temperature for 10 minutes, subsequent operations were carried out according to the method described above, and finally, the absorbance of the reaction system at 652 nm was measured.

## 2.8 Mechanism study

Free radical scavenging experiment:  $\text{Fe}_1/\text{SCN}$  (20  $\mu\text{L}$ , 1.0 mg  $\text{mL}^{-1}$ ), p-benzoquinone (100  $\mu\text{L}$ , 10 mM) and TMB (30  $\mu\text{L}$  20 mM) were mixed with HAc-NaAc buffer solution (1850  $\mu\text{L}$  0.2 M, pH=4.0). After incubation at room temperature for 10min, the absorbance of the system at 652 nm was measured. Subsequently, p-benzoquinone was replaced with tryptophan (5 mM), and isopropanol (5 mM) in sequence, and the absorbance of the system in the presence of different free radical scavengers was recorded.

The mechanistic influence of oxytetracycline (OTC) on the  $\text{Fe}_1/\text{SCN}$ -catalyzed TMB- $\text{H}_2\text{O}_2$  colorimetric system was investigated using electron paramagnetic resonance (EPR). Specifically, DMPO was employed as  $\cdot\text{O}_2^-$  scavenger to probe the reaction pathway. In these experiments, the  $\text{Fe}_1/\text{SCN}$ - $\text{H}_2\text{O}_2$ -TMB system was supplemented with 50.0  $\mu\text{L}$  of DPMO solution, 50  $\mu\text{L}$  of OTC (1 mg/mL), or both agents simultaneously. After a 5-minute incubation period, Subsequently, EPR spectra were acquired to directly monitor the effect of OTC on the evolution of radical species

during the reaction.

## **2.9 Detection of OTC in Actual Samples**

The detection capability of the Fe<sup>III</sup>/SCN-based colorimetric sensing platform for real-sample analysis was evaluated through standard addition recovery experiments using three environmentally relevant water matrices: Xiangya Medical Wastewater, Aviation honey, and Raw milk. Prior to analysis, all water samples were pre-filtered through 0.2 µm microporous membranes to eliminate suspended particulates and interfering impurities. Oxytetracycline standard solutions at three concentrations (0.6, 9.0, and 27.0 µM) were introduced into the pretreated environmental water samples. The absorbance of each spiked sample was measured by UV-visible spectrophotometry, and the corresponding OTC concentrations were quantified against a pre-established calibration curve. Recovery rates were calculated according to the formula: Recovery (%) = (measured concentration/spiked concentration) × 100. These recovery data validate the accuracy and reliability of the method in complex aqueous matrices.

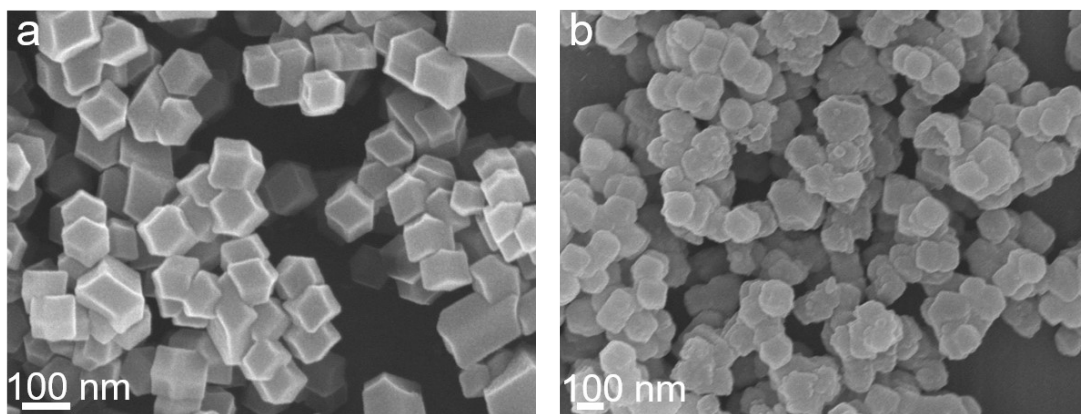

**Figure S1:** SEM image of ZIF-8(a) and H-ZIF-8 (b).



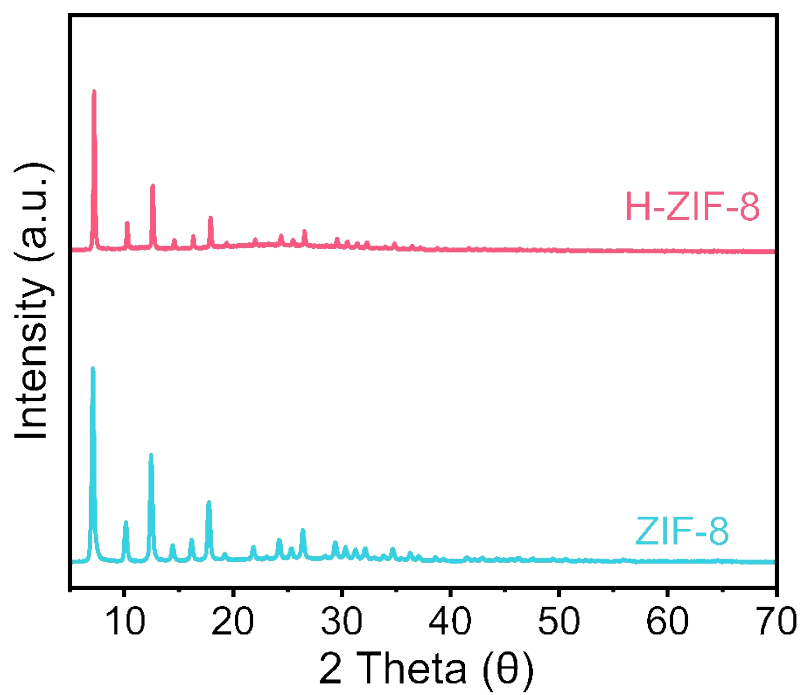

**Figure S2:** XRD patterns of H-ZIF-8 and ZIF-8.

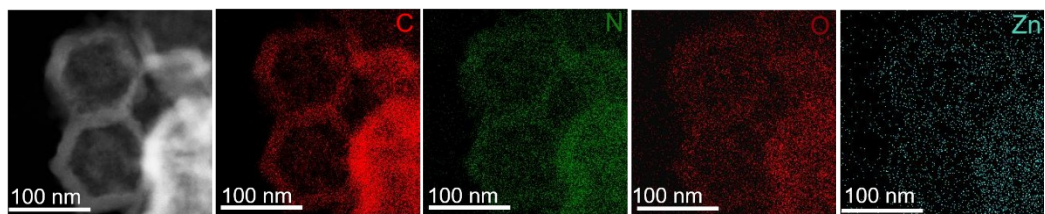

**Figure S3.** STEM image and the corresponding EDS mapping images of CN.

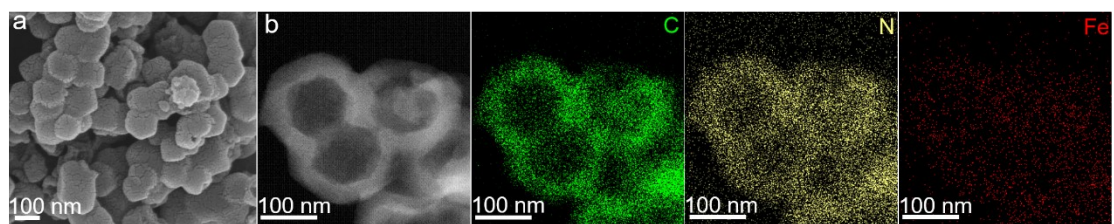

**Figure S4.** (a) SEM image and (b) STEM image and the corresponding EDS mapping images of Fe<sub>1</sub>/CN.

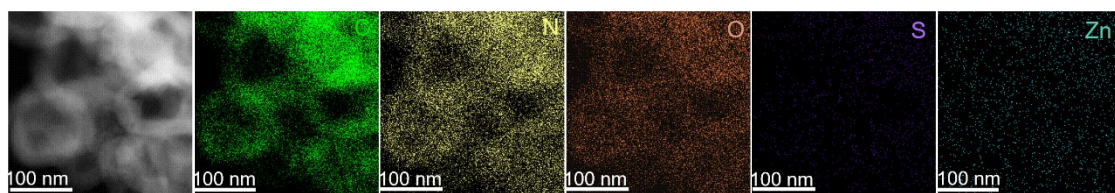

**Figure S5.** STEM image and the corresponding EDS mapping images of SCN.

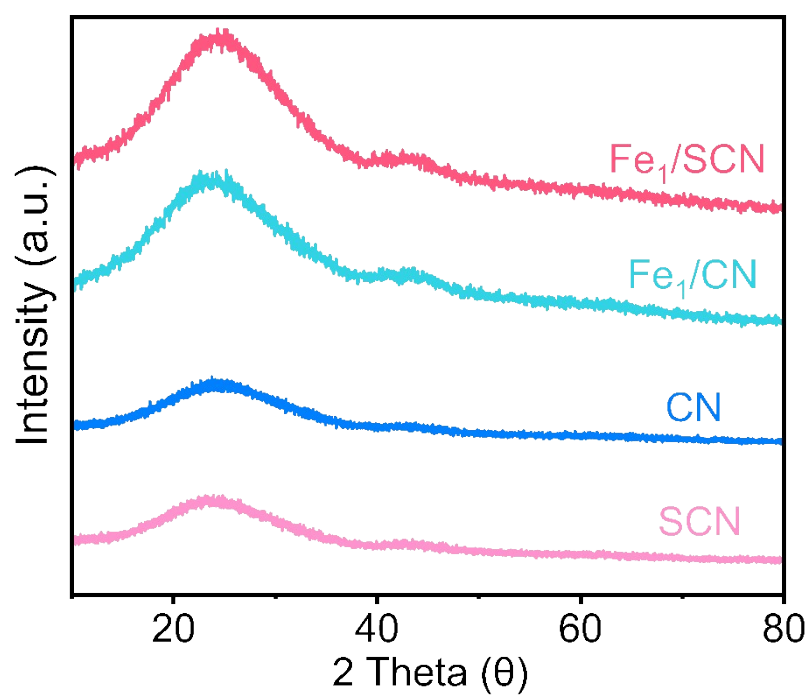

**Figure S6.** XRD patterns of Fe<sub>1</sub>/CN, Fe<sub>1</sub>/SCN, SCN, and CN.

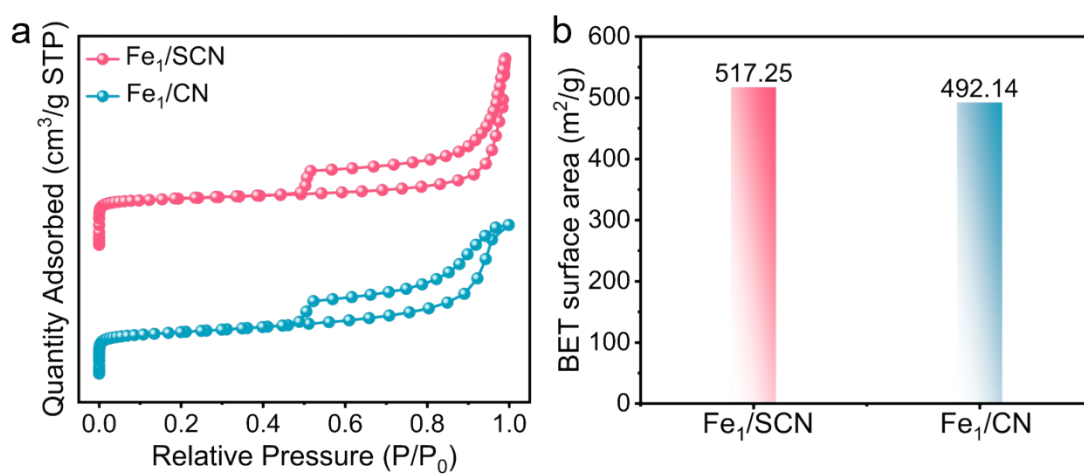

**Figure S7.** N<sub>2</sub> adsorption/desorption isotherms (a) and BET surface areas (b) of Fe<sub>1</sub>/SCN, and Fe<sub>1</sub>/CN.

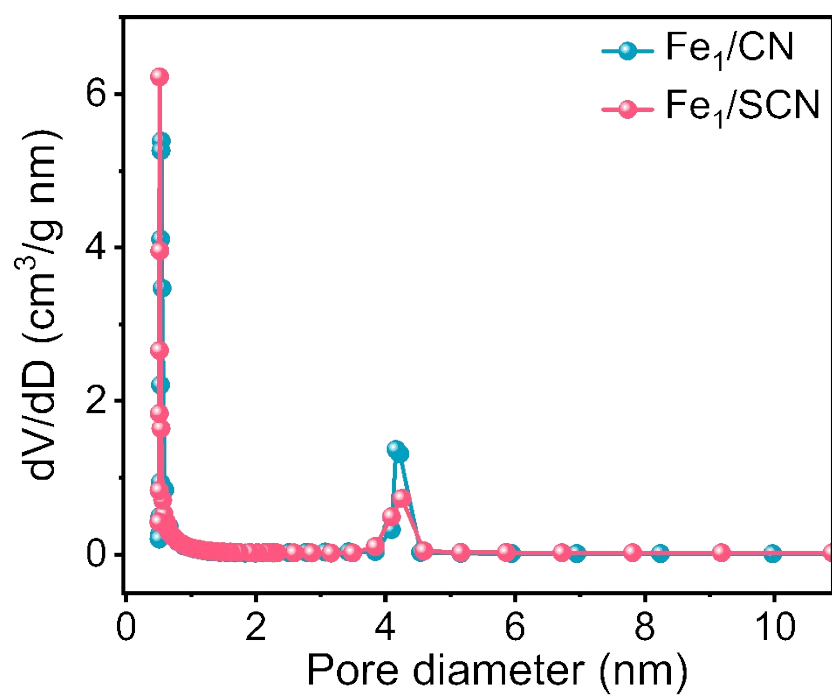

**Figure S8.** Pore diameter distribution for Fe<sub>1</sub>/SCN, and Fe<sub>1</sub>/CN catalysts.

**Table S1.** The BET surface area, pore diameter and pore volume of Fe<sub>1</sub>/SCN, and Fe<sub>1</sub>/CN catalysts.

| Samples              | BET<br>surface area<br>(m <sup>2</sup> g <sup>-1</sup> ) | Pore<br>diameter<br>(nm) | Microporous<br>diameter<br>(nm) | Mesoporous<br>diameter<br>(nm) | Pore<br>volume<br>(cm <sup>3</sup> g <sup>-1</sup> ) |
|----------------------|----------------------------------------------------------|--------------------------|---------------------------------|--------------------------------|------------------------------------------------------|
| Fe <sub>1</sub> /CN  | 492.14                                                   | 3.33                     | 0.51                            | 3.50                           | 0.81                                                 |
| Fe <sub>1</sub> /SCN | 517.25                                                   | 3.96                     | 0.54                            | 5.12                           | 1.02                                                 |



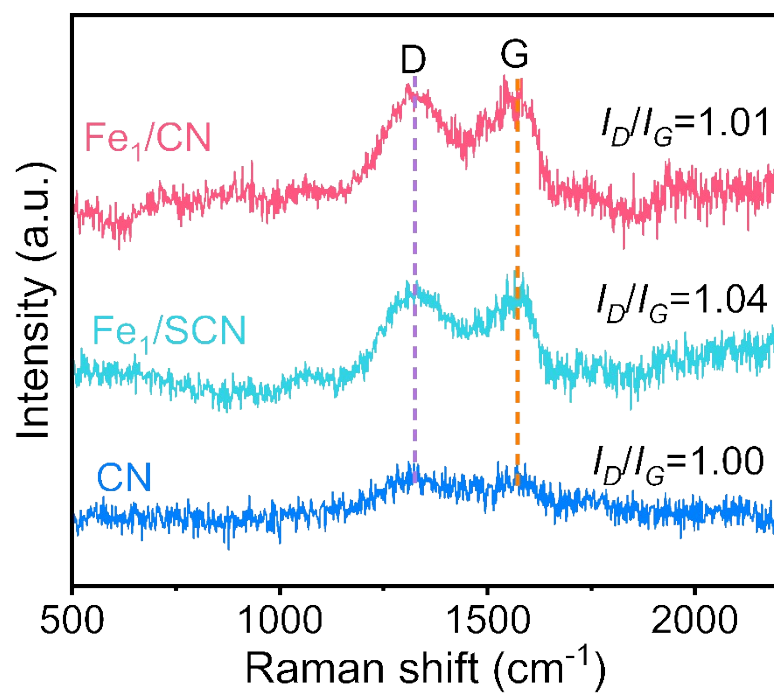

**Figure S9.** Raman spectra of CN,  $\text{Fe}_1/\text{SCN}$ , and  $\text{Fe}_1/\text{CN}$  catalysts.

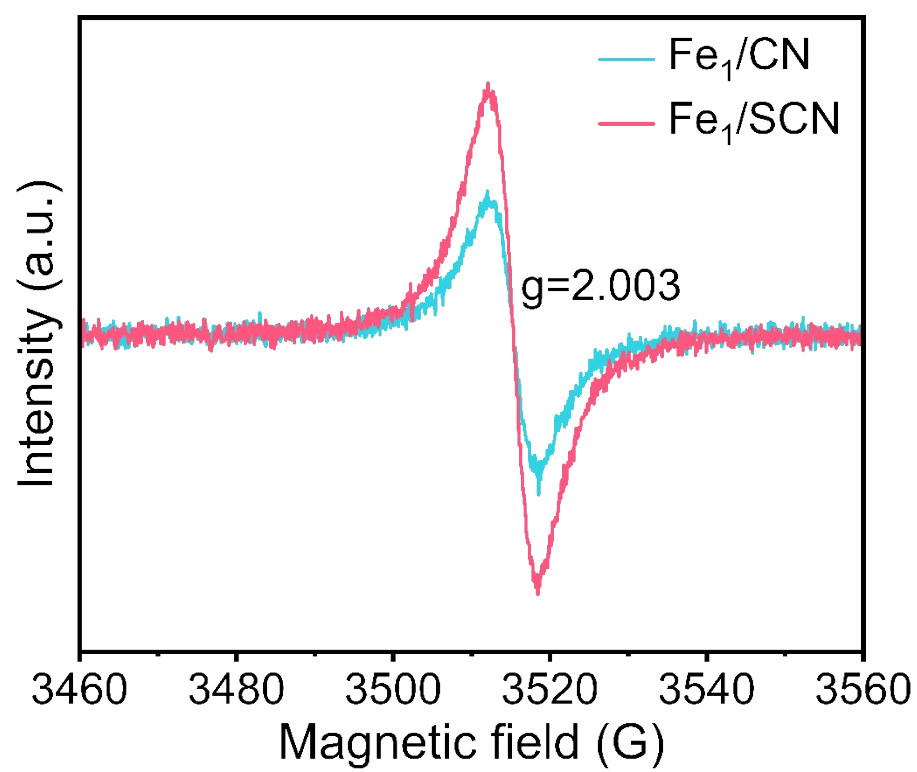

**Figure S10.** EPR spectra of Fe<sub>1</sub>/CN and Fe<sub>1</sub>/SCN.

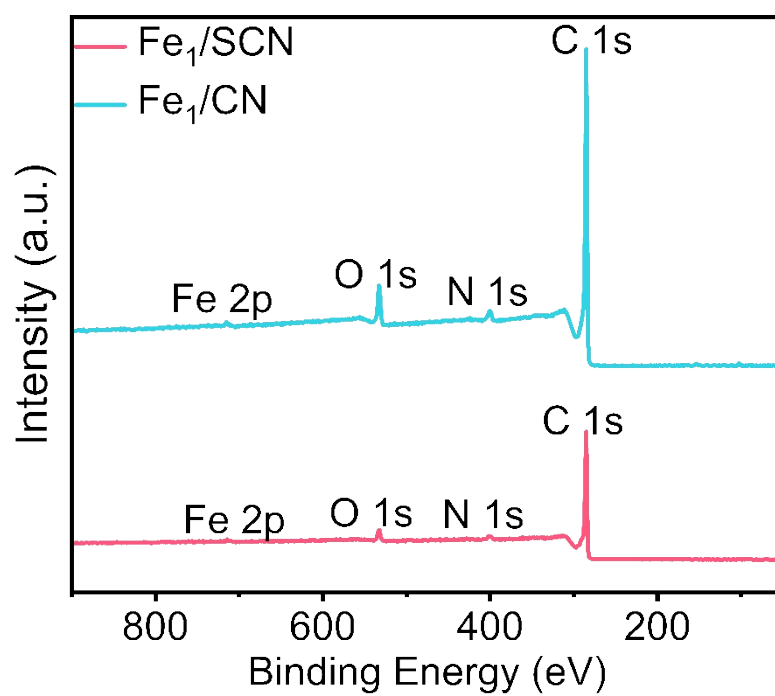

**Figure S11.** XPS surveys of Fe<sub>1</sub>/SCN, and Fe<sub>1</sub>/CN.

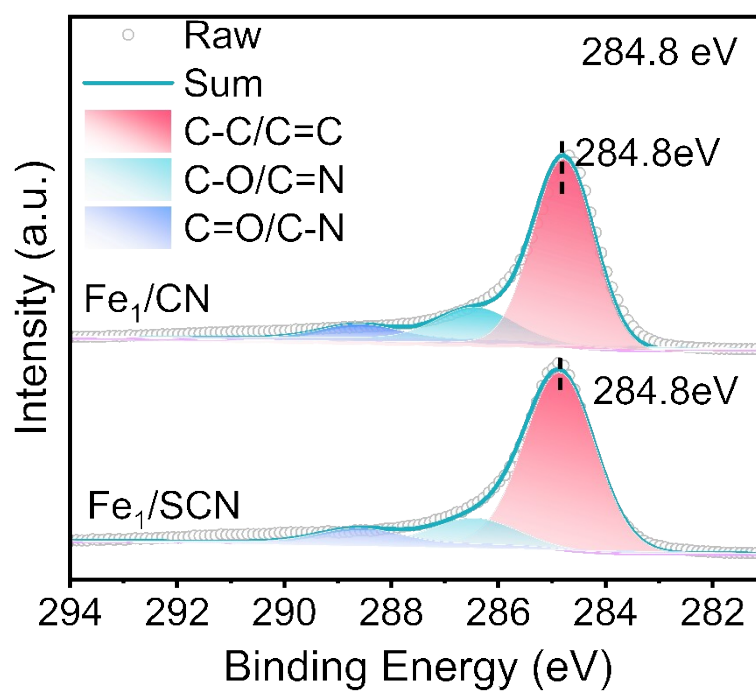

**Figure S12.** XPS spectra of C 1s for Fe<sub>1</sub>/SCN, and Fe<sub>1</sub>/CN catalysts.

**Table S2.** The statistical results of C, N, S and Fe atomic percentage from XPS.

| Peak Table |         |          |
|------------|---------|----------|
| Name       | FWHM eV | Atomic % |
| C1s        | 1.47    | 94.95    |
| N1s        | 2.62    | 4.04     |
| S2p        | 1.49    | 0.6      |
| Fe2p       | 0.16    | 0.41     |

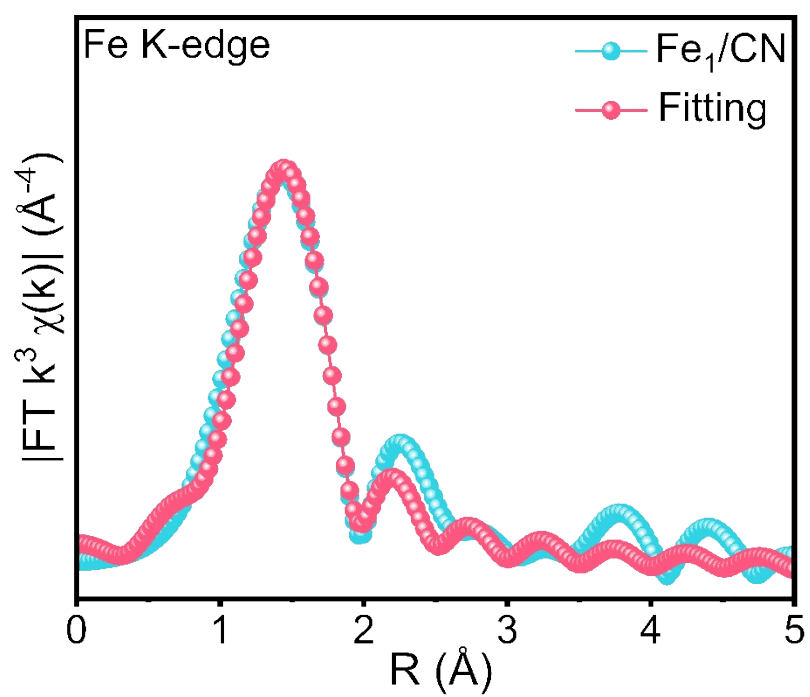

**Figure S13.** EXAFS fitting curves at the R space of  $\text{Fe}_1/\text{CN}$ .

**Table S3.** Fitting Parameters of Fe K-edge EXAFS curve.

| Sample               | Shell | CN   | R(Å) | $\sigma^2(\text{\AA}^2)$ | $\Delta E_0(\text{eV})$ | R factor |
|----------------------|-------|------|------|--------------------------|-------------------------|----------|
| Fe <sub>1</sub> /CN  | Fe-N  | 4.42 | 1.99 | 0.006                    | 1.59                    | 0.019    |
| Fe <sub>1</sub> /SCN | Fe-N  | 4.41 | 2.00 | 0.006                    | 0.93                    | 0.011    |

CN was coordination numbers. R was bond distance.  $\sigma^2$  was Debye-Waller factors.  $\Delta E_0$  was the inner potential correction. R factor reflected goodness of fitting.  $S_0^2$  was set to 0.87, according to the experimental EXAFS fitting of Te foil by fixing CN as the known crystallographic value. Error bounds were estimated as  $\text{CN} \pm 20\%$ ;  $R \pm 1\%$ ;  $\sigma^2 \pm 20\%$ .

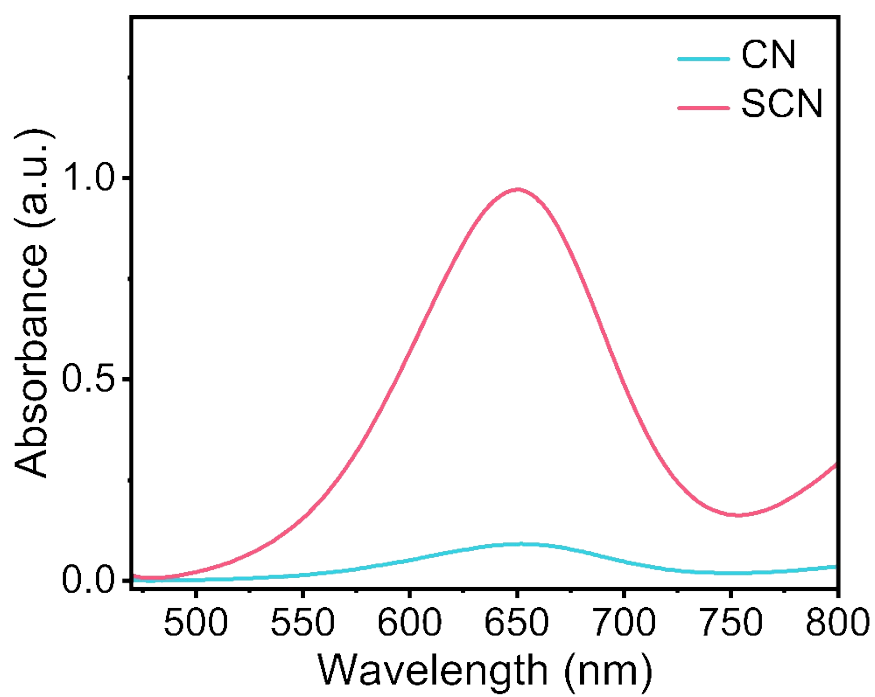

**Figure S14.** UV-vis absorption spectra of SCN and CN reaction with  $\text{H}_2\text{O}_2$ +TMB.



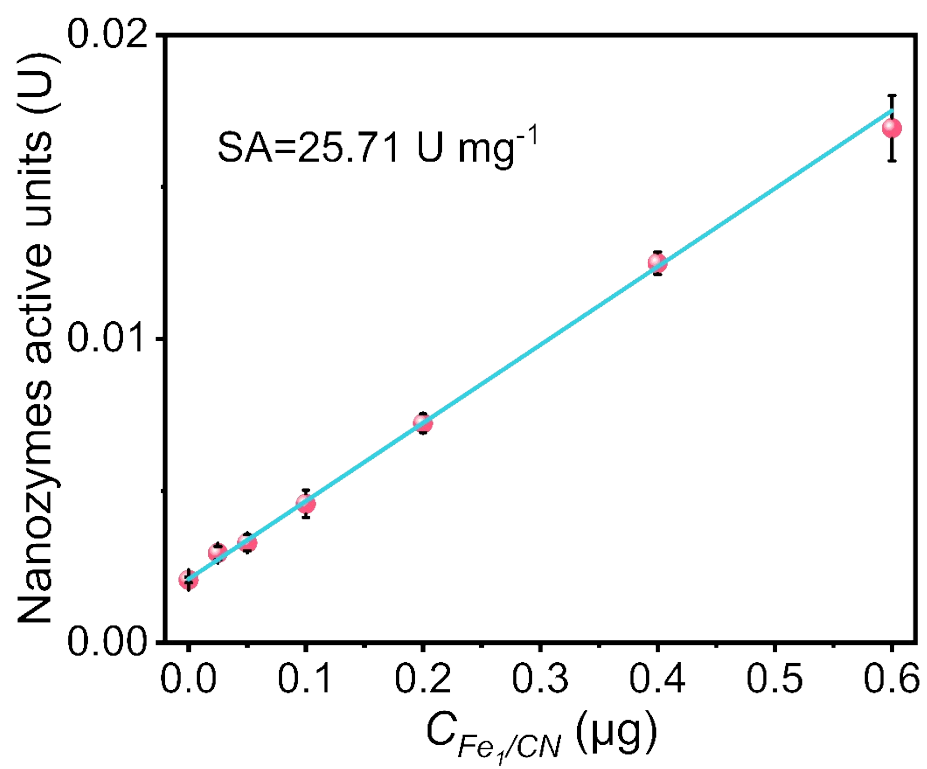

**Figure S15.** Specific activity analysis of  $Fe_1/CN$  catalysts.

**Table S4.** Comparison of the specific activity of Fe<sub>1</sub>/SCN and Fe<sub>1</sub>/CN with other materials

| <b>SAzymes</b>                          | <b>POD-like specific activity<br/>(U mg<sup>-1</sup>)</b> | <b>Ref.</b> |
|-----------------------------------------|-----------------------------------------------------------|-------------|
| Fe <sub>1</sub> /SCN                    | 89.08                                                     | This work   |
| Fe <sub>1</sub> /CN                     | 25.71                                                     | This work   |
| MnSA-N <sub>3</sub> -C                  | 51.3                                                      | [3]         |
| Cu-JMCNs                                | 2.46                                                      | [4]         |
| FeN <sub>5</sub> -SA                    | 30.96                                                     | [5]         |
| CuN <sub>3</sub>                        | 11.33                                                     | [6]         |
| Pt <sub>TS</sub>                        | 21.8                                                      | [7]         |
| FeNCP/NWs                               | 86.9                                                      | [8]         |
| FeNC/NW                                 | 47.1                                                      | [8]         |
| FeCuNC                                  | 33.87                                                     | [9]         |
| FeNC                                    | 3.54                                                      | [9]         |
| FeNC/NW                                 | 47.1                                                      | [10]        |
| FeBNC                                   | 15.41                                                     | [10]        |
| FeNC                                    | 4.09                                                      | [10]        |
| H-MoN <sub>5</sub> @PtN <sub>4</sub> /C | 34.33                                                     | [11]        |
| Fe-B/N-C                                | 103.82                                                    | [12]        |
| Fe-N-C SAzymes                          | 36.93                                                     | [12]        |
| Zn-SA/CNC                               | 66.7                                                      | [13]        |
| Fe-SASC/NW                              | 42.8                                                      | [14]        |
| FeNC                                    | 24.83                                                     | [15]        |
| FeSNC                                   | 79.71                                                     | [15]        |
| GOD@FeN <sub>4</sub> -SAzyme            | 60.57                                                     | [16]        |
| FeSA                                    | 19.3                                                      | [17]        |
| FeSA-PtC                                | 87.7                                                      | [17]        |
| Fe-N <sub>5</sub> /SAC                  | 71.99                                                     | [18]        |
| FeN <sub>4</sub>                        | 25.33                                                     | [19]        |
| FeN <sub>4</sub> -SAzyme                | 33.8                                                      | [20]        |
| Fe <sub>3</sub> C@C/Fe-N-C              | 23.01                                                     | [21]        |
| Fe-N-C                                  | 10.12                                                     | [21]        |
| NG-Heme                                 | 67.3                                                      | [22]        |
| Mn/PSAE                                 | 5.04                                                      | [23]        |

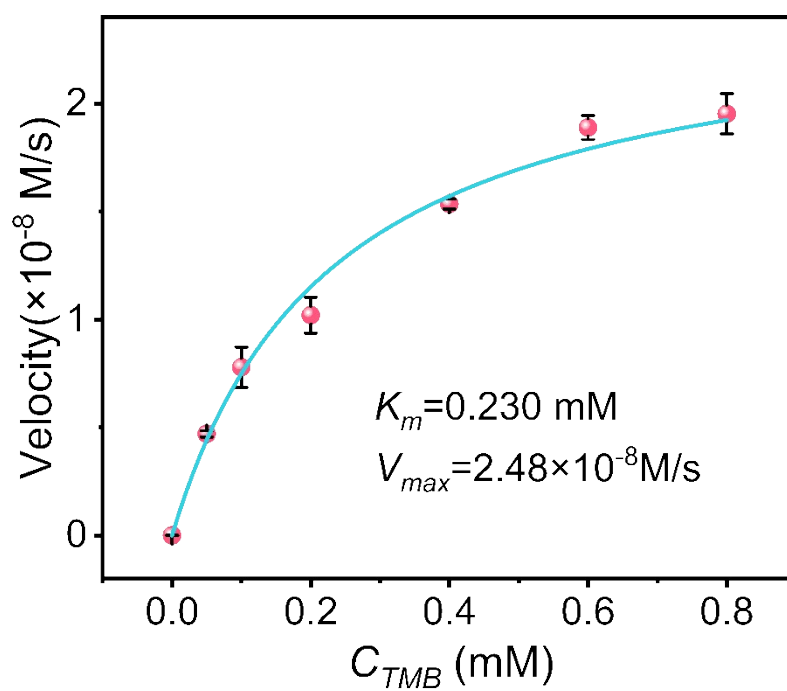

**Figure S16.** Steady-state kinetic assay of Fe<sub>1</sub>/CN with TMB as substrate.

**Table S5.** Kinetics parameters comparison of the Fe<sub>1</sub>/SCN and Fe<sub>1</sub>/CN with other catalysts

| Catalyst                       | [E]<br>(M)              | <i>Km</i><br>(mM) | <i>Vmax</i><br>(10 <sup>-8</sup> M s <sup>-1</sup> ) | <i>V<sub>max</sub>/m</i> | <i>kcat</i><br>(s <sup>-1</sup> ) | <i>kcat/Km</i><br>(mM <sup>-1</sup> s <sup>-1</sup> ) | Ref. |
|--------------------------------|-------------------------|-------------------|------------------------------------------------------|--------------------------|-----------------------------------|-------------------------------------------------------|------|
| FeNSC                          | 8.495×10 <sup>-9</sup>  | 0.067             | 4.70                                                 | 47                       | 5.53                              | 81.34                                                 | This |
| FeNC                           | 8.495×10 <sup>-9</sup>  | 0.23              | 2.48                                                 | 24.8                     | 2.91                              | 12.68                                                 | work |
| CuN <sub>3</sub> .SAzyme       | 9.31×10 <sup>-6</sup>   | 1.61              | 164                                                  | 45.56                    | 0.18                              | 109.3                                                 | [4]  |
| Fe—B/N—C                       | 2.03×10 <sup>-7</sup>   | 0.378             | 357.5                                                | 71.5                     | 17.61                             | 46.6                                                  | [10] |
| f-FeNC                         | 8.06×10 <sup>-8</sup>   | 0.154             | 3.61                                                 | 7.22                     | 0.45                              | 2.92                                                  | [22] |
| Fe-S/N-C                       | 2.6×10 <sup>-7</sup>    | 0.33              | 130                                                  | 74.28                    | 5.02                              | 15.21                                                 | [23] |
| Fe SAEs                        | 1.07×10 <sup>-6</sup>   | 3.92              | 58.8                                                 | 58.8                     | 0.55                              | 0.14                                                  | [24] |
| Cu-N-C                         | 2.68×10 <sup>-6</sup>   | 3.76              | 75.05                                                | 75.05                    | 0.283                             | 0.0746                                                | [25] |
| Fe-MOF                         | 4.9×10 <sup>-5</sup>    | 2.6               | 5.6                                                  | 0.56                     | 0.0011                            | 0.42                                                  | [26] |
| Cu—N—C                         | 2.68×10 <sup>-6</sup>   | 3.76              | 75.1                                                 | 75.1                     | 0.28                              | 0.075                                                 | [27] |
| Zn-N-C                         | 4.8×10 <sup>-5</sup>    | 0.224             | 10.66                                                | 10.66                    | 0.0022                            | 9.8                                                   | [28] |
| Fe <sub>3</sub> O <sub>4</sub> | 3.87 × 10 <sup>-3</sup> | 0.382             | 123                                                  | 4.1                      | 3.18 × 10 <sup>-5</sup>           | 8.32 × 10 <sup>-5</sup>                               | [29] |
| Fe SAEs                        | 1.07×10 <sup>-6</sup>   | 3.92              | 58.8                                                 | 58.8                     | /                                 | /                                                     | [30] |
| G-Heme                         | 2.67×10 <sup>-6</sup>   | 0.35              | 0.27                                                 | 0.3                      | 0.010                             | 29.14                                                 | [20] |
| Fe-N-C                         | 7.48×10 <sup>-6</sup>   | 1.48              | 5.6                                                  | 0.56                     | 0.075                             | 50.67                                                 | [8]  |
| Cu-N-C                         | 2.68×10 <sup>-6</sup>   | 3.76              | 20.1                                                 | 20.1                     | 0.2803                            | 74.6                                                  | [31] |
| Cu NPs/N-C                     | 2.58×10 <sup>-5</sup>   | 1.57              | 12.76                                                | 12.76                    | 0.0049                            | 3.1                                                   | [31] |

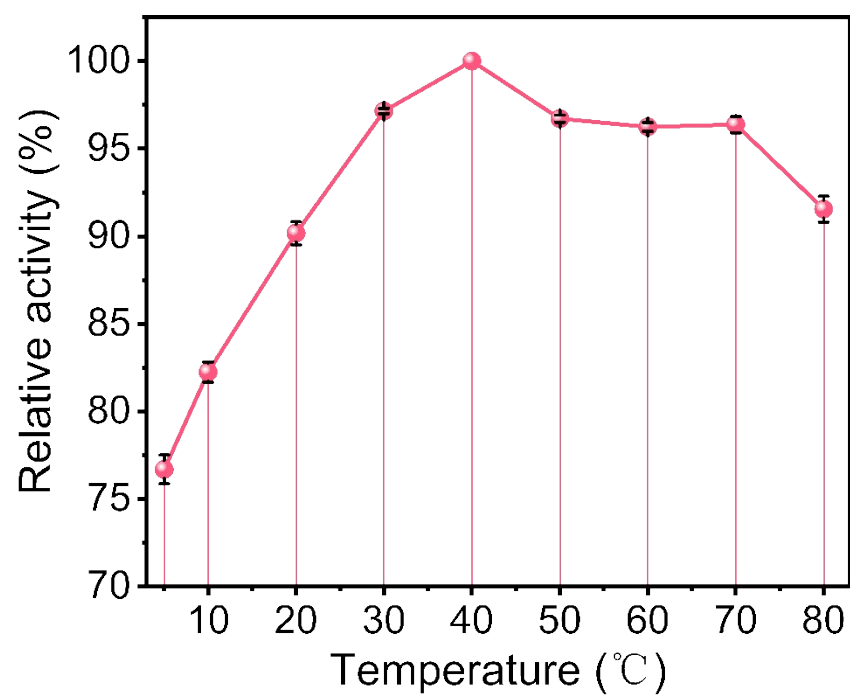

**Figure S17.** Relative activity of  $\text{Fe}_I/\text{SCN}$  reaction system for POD-like activity under different temperature (5–80 $^{\circ}\text{C}$ ).

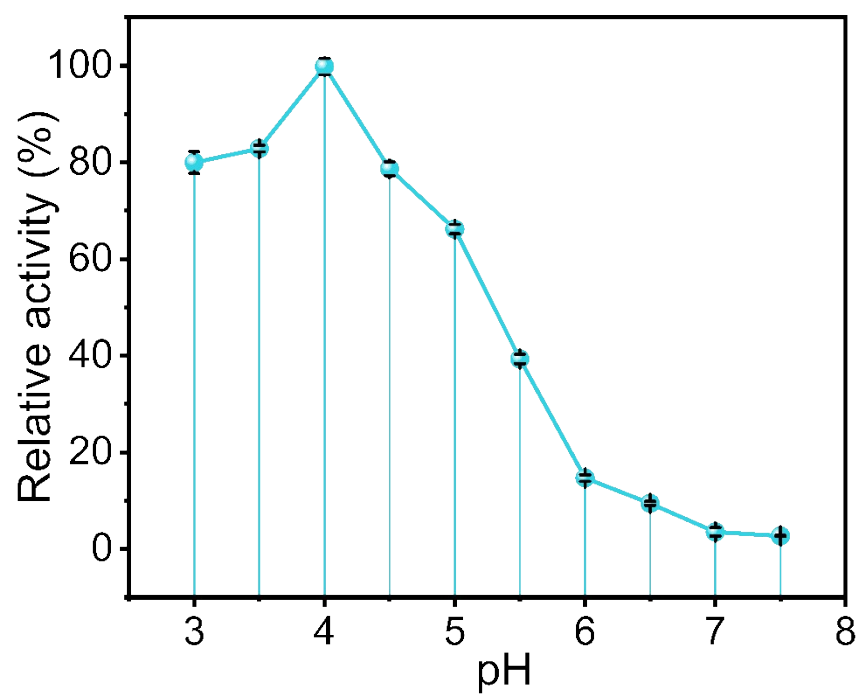

**Figure S18.** Relative activity of  $\text{Fe}_I/\text{SCN}$  reaction system for oxidase-like activity within pH range (3.0–7.5).

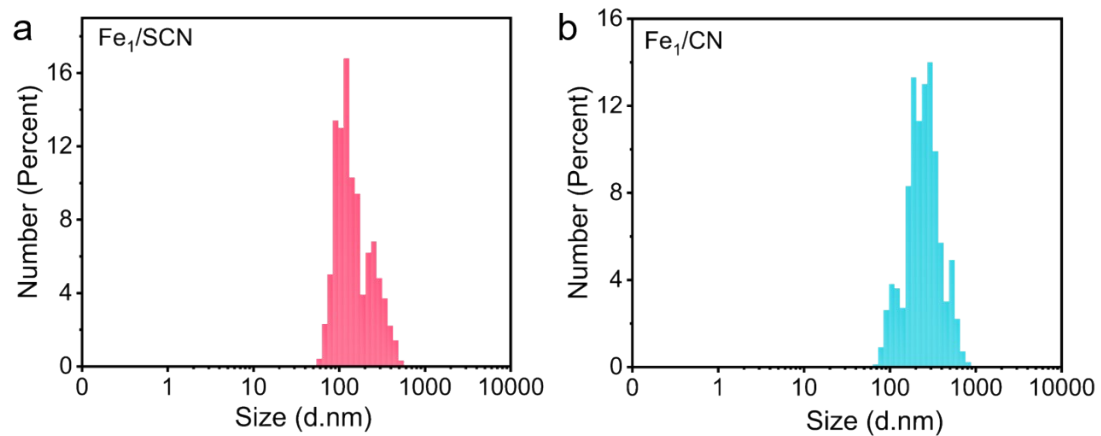

**Figure S19.** The dynamic light scattering (DLS) particle size analysis on  $\text{Fe}_1/\text{SCN}$  (a) and  $\text{Fe}_1/\text{CN}$  (b) in buffer solution.

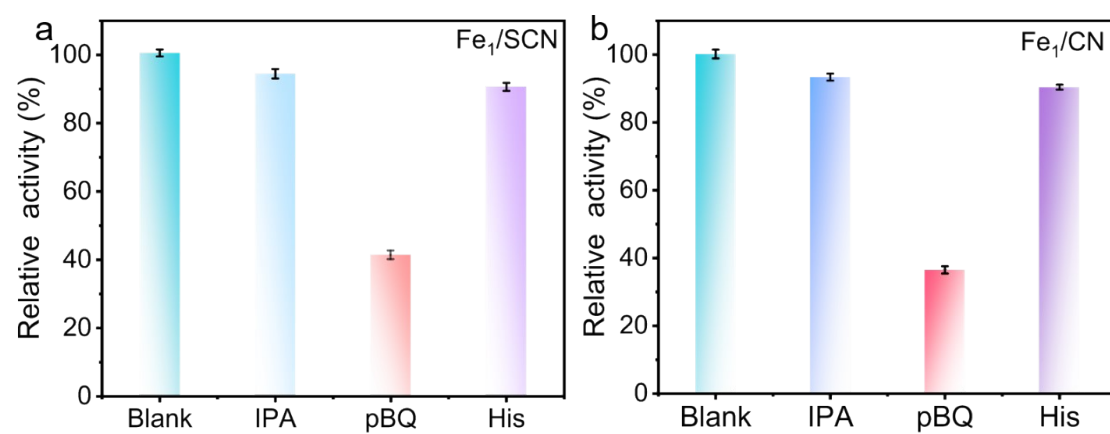

**Figure S20.** Effect of free radical scavengers on the performance of Fe<sub>1</sub>/SCN (a) and Fe<sub>1</sub>/CN (b).



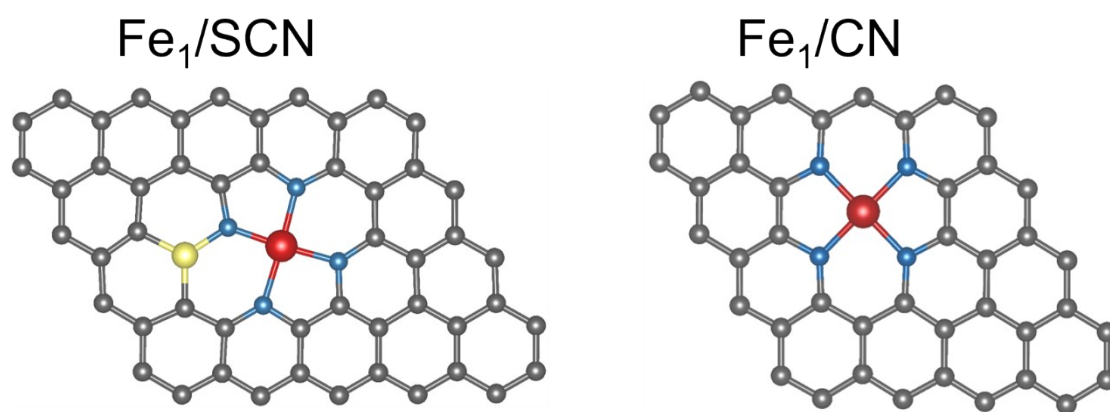

**Figure S21.** Structural model optimization of  $\text{Fe}_1/\text{SCN}$  and  $\text{Fe}_1/\text{CN}$ .

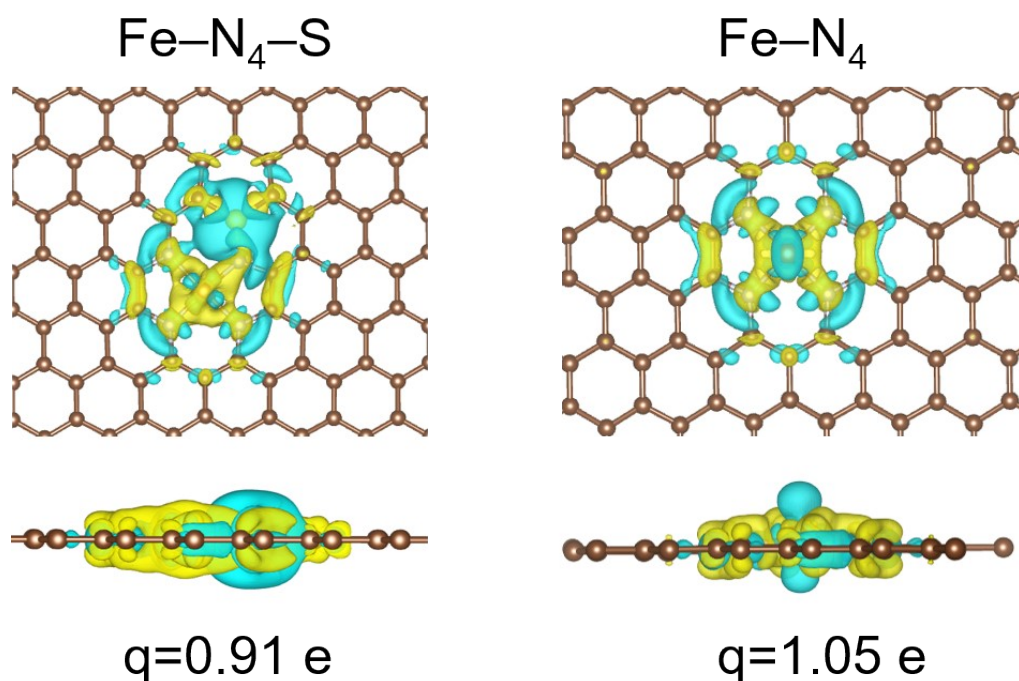

**Figure S22.** The charge density difference and Bader charge of Fe-N<sub>4</sub> and (b) Fe-N<sub>4</sub>-S.

Bader charge analysis reveals that the Fe atom carries charges of +1.05 e and +0.91 e in the Fe-N<sub>4</sub> and Fe-N<sub>4</sub>-S configurations, respectively, indicating that S-doping in the second coordination shell effectively modulates the electronic structure of the Fe center, resulting in a lower oxidation state of Fe in Fe-N<sub>4</sub>-S compared to the planar Fe-N<sub>4</sub> site. The electron localization between Fe-S and Fe-N bonds (green regions between Fe-S and Fe-N bonds) is lower than that in Fe-N bonds, which is attributed to the weaker electron-withdrawing effect of S. This distinct electronic environment induces charge polarization, thereby optimizing the adsorption-desorption behavior of oxygen intermediates and leading to significantly enhanced catalytic activity.

**Scheme S1.** The POD-like reaction pathways involve four elementary steps

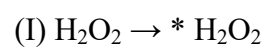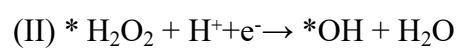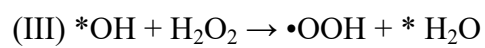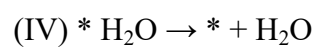

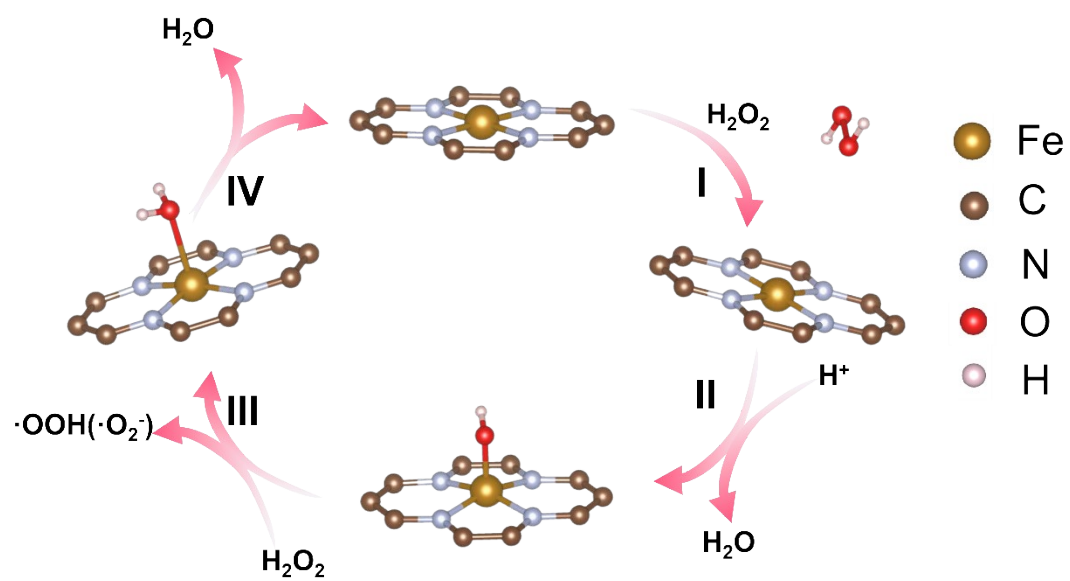

**Figure S23.** Schematics of the proposed reaction pathways of Fe<sub>I</sub>/CN for POD-like reaction.

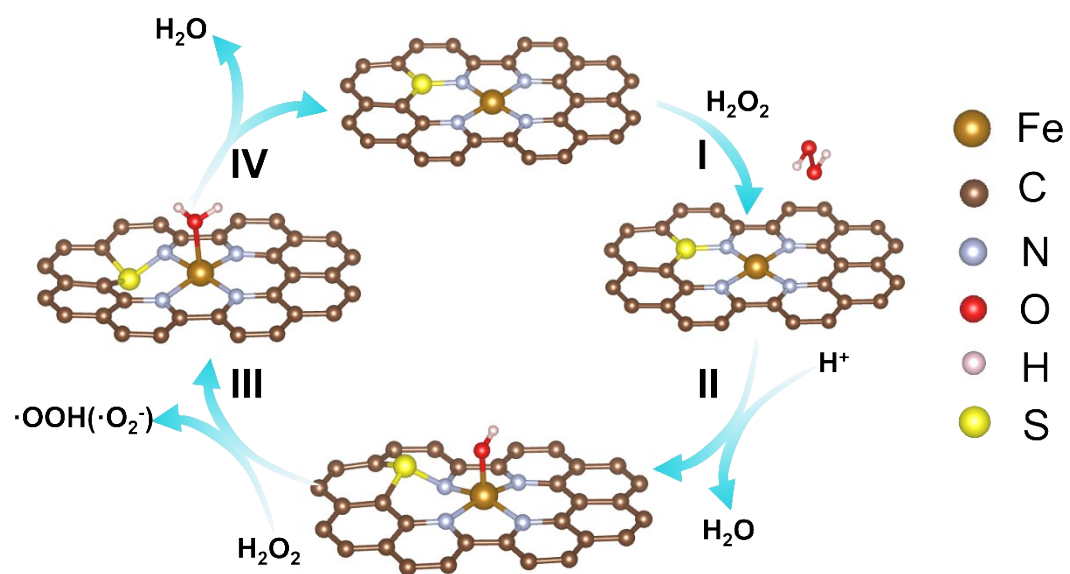

**Figure S24.** Schematics of the proposed reaction pathways of Fe<sub>1</sub>/SCN for POD-like reaction.

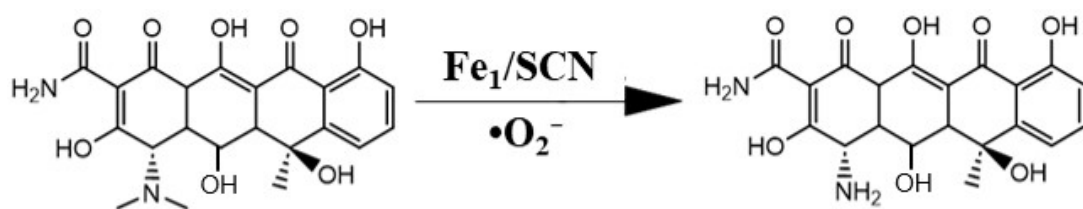

**Figure S25.** The possible pathway for the consumption of  $\bullet\text{O}_2^-$  by OTC in the  $\text{Fe}_1/\text{SCN}$ -catalyzed TMB- $\text{H}_2\text{O}_2$  system.

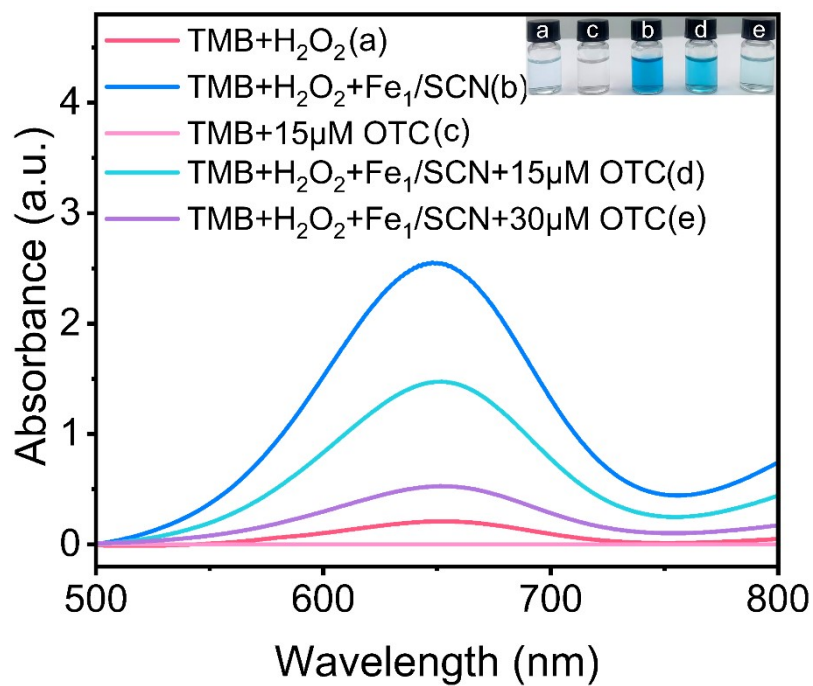

**Figure S26.** UV-vis spectra of Fe<sub>1</sub>/SCN+ TMB+H<sub>2</sub>O<sub>2</sub>, Fe<sub>1</sub>/SCN+ OTC + TMB+H<sub>2</sub>O<sub>2</sub>, TMB+H<sub>2</sub>O<sub>2</sub>, and OTC + TMB.

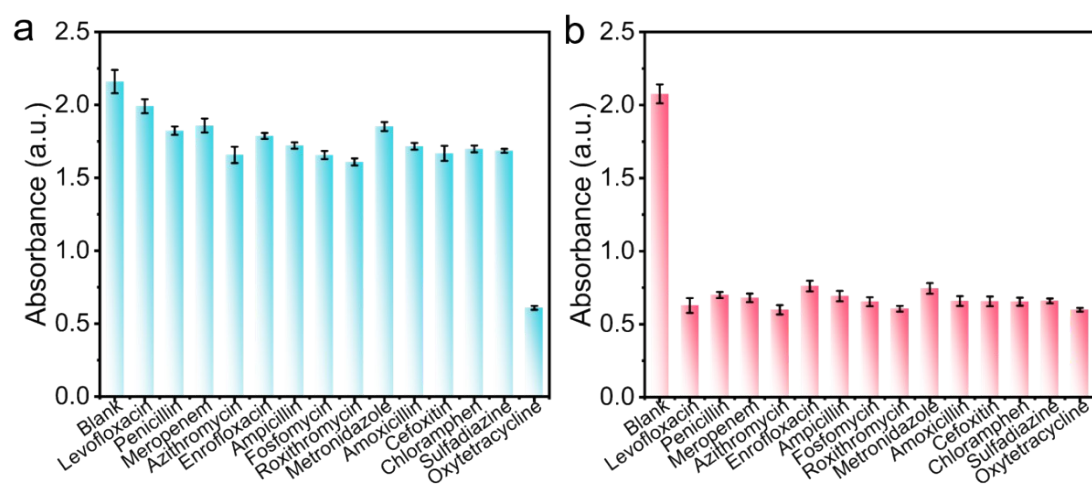

**Figure S27.** (a) The selectivity of the OTC detection for  $\text{Fe}_1/\text{SCN}+\text{TMB}+\text{H}_2\text{O}_2$  system. (b) Anti-interference ability of  $\text{Fe}_1/\text{SCN}+\text{TMB}+\text{H}_2\text{O}_2$  by mixing OTC with other interferents ( $\text{Fe}_1/\text{SCN}$ : 1 mg/mL;  $\text{H}_2\text{O}_2$ : 200 mM; TMB: 20 mM; OTC: 10  $\mu\text{M}$ , other 13 antibiotics: 20  $\mu\text{M}$ ; sodium acetate buffer: 200 mM, pH = 4).



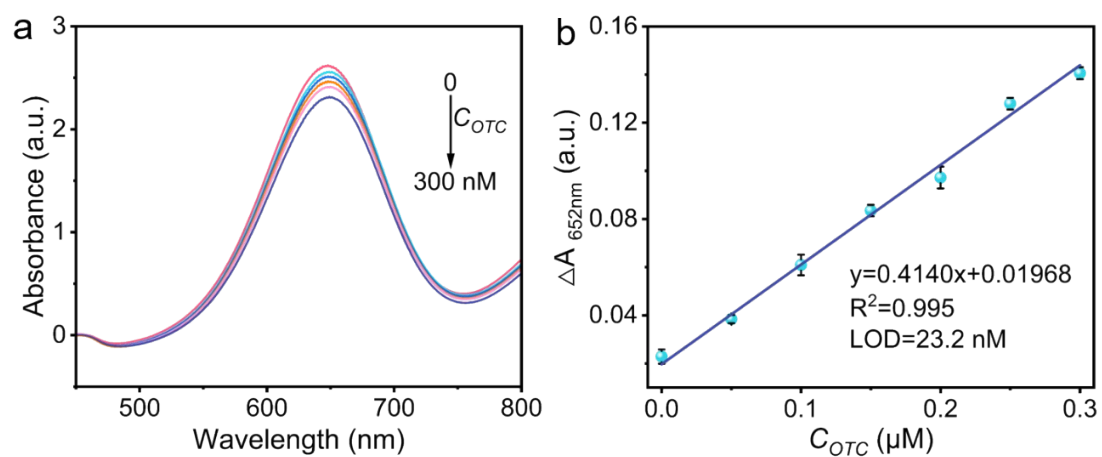

**Figure S28.** (a) UV-vis absorption spectra of  $Fe_I/SCN+TMB+H_2O_2$  with different OTC concentrations (0-300 nM). (b) Relationship between the absorbance change ( $\Delta A_{652\text{ nm}}$ ) and the concentration of OTC.

**Table S6.** Comparison of the detection of OTC with other materials.

| <b>Material</b>                                                                 | <b>Method</b> | <b>Linear range (μM)</b> | <b>LOD (μM)</b> | <b>Ref.</b> |
|---------------------------------------------------------------------------------|---------------|--------------------------|-----------------|-------------|
| Fe <sub>1</sub> /SNC                                                            | colorimetric  | 0.3-32                   | 0.126           | This work   |
|                                                                                 |               | 0-0.3                    | 0.0232          |             |
| LTN@AuNCs                                                                       | colorimetric  | 0.5–15.0                 | 0.3             | [34]        |
| CM                                                                              | Colorimetric  | 2–100                    | 0.66            | [35]        |
| CDsLDHs@MnO <sub>2</sub> /Fe <sub>3</sub> O <sub>4</sub><br>magnetic micromotor | Colorimetric  | 0–100                    | 0.291           | [36]        |
| Borophene QDs                                                                   | Colorimetric  | 0 – 200                  | 1.10            | [37]        |
| N-CDs@Zr hybrid                                                                 | Colorimetric  | 0 – 200                  | 5.04            | [38]        |
|                                                                                 |               | 200-800                  |                 |             |
| CDs                                                                             | Fluorometric  | 0 - 40                   | 0.41            | [39]        |
| CuNZs                                                                           | Colorimetric  | 50–500                   | 0.148           | [40]        |
| UIO-66-NH <sub>2</sub>                                                          | Fluorometric  | 0-37.5                   | 0.431           | [41]        |
| CDs                                                                             | Fluorescent   | 10.0–400.0               | 6.0             | [42]        |

**Table S7.** Determination of OTC in real samples

| Sample              | Added ( $\mu\text{M}$ ) | Detected ( $\mu\text{M}$ ) | Recovery (%) | RSD (% $n=3$ ) |
|---------------------|-------------------------|----------------------------|--------------|----------------|
|                     | 0                       | N                          | -            | -              |
| Medical wastewater  | 0.6                     | 0.626                      | 104.37       | 3.57           |
| (Xiangya Hospital ) | 9                       | 8.351                      | 92.80        | 1.97           |
|                     | 27                      | 25.108                     | 92.99        | 2.34           |
|                     | 0                       | N                          | -            | -              |
| Honey               | 0.6                     | 0.620                      | 103.33       | 1.79           |
|                     | 9                       | 9.428                      | 104.76       | 5.05           |
|                     | 27                      | 24.898                     | 92.21        | 2.89           |
|                     | 0                       | N                          | -            | -              |
| Raw milk            | 0.6                     | 0.571                      | 95.09        | 6.43           |
|                     | 9                       | 8.550                      | 95.00        | 4.13           |
|                     | 27                      | 28.442                     | 105.34       | 5.88           |

## References

- [1] Chen, S.; Li, X.; Kao, C.-W.; Luo, T.; Chen, K.; Fu, J.; Ma, C.; Li, H.; Li, M.; Chan, T.-S.; Liu, M. Unveiling the Proton-Feeding Effect in Sulfur-Doped Fe–N–C Single-Atom Catalyst for Enhanced CO<sub>2</sub> Electroreduction. *Angew. Chem. Int. Ed.* **2022**, *61*, e202206233.
- [2] Tang, L.-J.; Gao, Z.-W.; Yang, Y.-F.; Liu, Z.-H.; Yang, M.; Song, Z.-Y.; Chen, S.-H.; Huang, X.-J. Sulfur-Engineered Second-Shell in Fe-N<sub>4</sub> Catalysts: Dual Active Sites Harmonized Activity and Stability in Real Water Environment. *Small* **2025**, *21*, e06829
- [3] Wang, Y.; Cho, A.; Jia, G.; Cui, X.; Shin, J.; Nam, I.; Noh, K.-J.; Park, B. J.; Huang, R.; Han, J. W. Tuning Local Coordination Environments of Manganese Single-Atom Nanozymes with Multi-Enzyme Properties for Selective Colorimetric Biosensing. *Angew. Chem. Int. Ed.* **2023**, *62*, e202300119.
- [4] Xing, Y.; Xiu, J.; Zhou, M.; Xu, T.; Zhang, M.; Li, H.; Li, X.; Du, X.; Ma, T.; Zhang, X. Copper Single-Atom Jellyfish-like Nanomotors for Enhanced Tumor Penetration and Nanocatalytic Therapy. *ACS Nano* **2023**, *17*, 6789–6799.
- [5] Li, R.; Jiao, L.; Jia, X.; Yan, L.; Li, X.; Yan, D.; Zhai, Y.; Zhu, C.; Lu, X. Bioinspired FeN<sub>5</sub> Sites with Enhanced Peroxidase-like Activity Enable Colorimetric Sensing of Uranyl Ions in Seawater. *Anal. Chem.* **2024**, *96* (7), 3124–3130.
- [6] Wu, J.; Zhu, X.; Li, Q.; Fu, Q.; Wang, B.; Li, B.; Wang, S.; Chang, Q.; Xiang, H.; Ye, C. Enhancing radiation-resistance and peroxidase-like activity of single-atom copper nanozyme via local coordination manipulation. *Nat. Commun.* **2024**, *15* (1), 6174.
- [7] Chen, Y.; Wang, P.; Hao, H.; Hong, J.; Li, H.; Ji, S.; Li, A.; Gao, R.; Dong, J.; Han, X. Thermal Atomization of Platinum Nanoparticles into Single Atoms: An Effective Strategy for Engineering High-Performance Nanozymes. *J. Am. Chem. Soc.* **2021**, *143* (44), 18643–18651.
- [8] Ding, S.; Barr, J. A.; Lyu, Z.; Zhang, F.; Wang, M.; Tieu, P.; Li, X.; Engelhard, M. H.; Feng, Z.; Beckman, S. P.; et al. Effect of Phosphorus Modulation in Iron Single-Atom Catalysts for Peroxidase Mimicking. *Adv. Mater.* **2024**, *36* (10), 2209633.
- [9] Jiao, L.; Tao, N.; Kang, Y.; Song, W.; Chen, Y.; Zhang, Y.; Xu, W.; Wu, Y.; Gu,

W.; Zheng, L.; Chen, L.; Deng, L.; Zhu, C.; Liu, Y.-N. Biomimetic Fe-Cu Dual-atomic-site Catalysts Enable Efficient H<sub>2</sub>O<sub>2</sub> Activation for Tumor Lymphatic Metastasis Inhibition. *Nano Today* **2023**, *50*, 101859.

[10] Jiao, L.; Xu, W.; Zhang, Y.; Wu, Y.; Gu, W.; Ge, X.; Chen, B.; Zhu, C.; Guo, S. Boron-doped Fe-N-C single-atom nanozymes specifically boost peroxidase-like activity. *Nano Today* **2020**, *35*, 100971.

[11] Zhao, Q.; Zhang, M.; Gao, Y.; Dong, H.; Zheng, L.; Zhang, Y.; Ouyang, J.; Na, N. Rearranging Spin Electrons by Axial-Ligand-Induced Orbital Splitting to Regulate Enzymatic Activity of Single-Atom Nanozyme with Destructive d- $\pi$  Conjugation. *J. Am. Chem. Soc.* **2024**, *146* (21), 14875-14888.

[12] Liu, W.; Shi, E.; Wu, H.; Liang, Y.; Chen, M.; Zhang, H.; Zhang, R.; Li, X.; Wang, Y.; Zhang, L. Spatially Axial Boron Coordinated Single-Atom Nanozymes with Boosted Multi-Enzymatic Performances for Periodontitis Treatment. *Adv. Funct. Mater.* **2024**, *34* (39), 2403386.

[13] Wei, S.; Ma, W.; Sun, M.; Xiang, P.; Tian, Z.; Mao, L.; Gao, L.; Li, Y. Atom-pair engineering of single-atom nanozyme for boosting peroxidase-like activity. *Nat. Commun.* **2024**, *15* (1), 6888.

[14] Ding, S.; Lyu, Z.; Fang, L.; Li, T.; Zhu, W.; Li, S.; Li, X.; Li, J.-C.; Du, D.; Lin, Y. Single-Atomic Site Catalyst with Heme Enzymes-Like Active Sites for Electrochemical Sensing of Hydrogen Peroxide. *Small* **2021**, *17* (25), 2100664.

[15] Jiao, L.; Kang, Y.; Chen, Y.; Wu, N.; Wu, Y.; Xu, W.; Wei, X.; Wang, H.; Gu, W.; Zheng, L. Unsymmetrically coordinated single Fe-N<sub>3</sub>S<sub>1</sub> sites mimic the function of peroxidase. *Nano Today* **2021**, *40*, 101261.

[16] Zhu, X.; Wu, J.; Liu, R.; Xiang, H.; Zhang, W.; Chang, Q.; Wang, S.; Jiang, R.; Zhao, F.; Li, Q.; Huang, L.; Yan, L.; Zhao, Y. Engineering Single-Atom Iron Nanozymes with Radiation-Enhanced Self-Cascade Catalysis and Self-Supplied H<sub>2</sub>O<sub>2</sub> for Radio-enzymatic Therapy. *ACS Nano* **2022**, *16*, 18849–18862.

[17] Chen, Y.; Wang, P.; Hao, H.; Hong, J.; Li, H.; Ji, S.; Li, A.; Gao, R.; Dong, J.; Han, X. Thermal Atomization of Platinum Nanoparticles into Single Atoms: An Effective Strategy for Engineering High-Performance Nanozymes. *J. Am. Chem. Soc.*

**2021**, *143* (44), 18643-18651.

[18] Zhu, L.; Zhong, H.; Du, D.; Li, T.; Nguyen, H.; Beckman, S. P.; Xu, W.; Li, J.-C.; Cheng, N.; Lin, Y. A peroxidase-like single-atom Fe-N<sub>5</sub> active site for effective killing human lung adenocarcinoma cells. *Nano Research* **2023**, *16* (4), 5216-5225.

[19] Jiao, L.; Wu, J.; Zhong, H.; Zhang, Y.; Xu, W.; Wu, Y.; Chen, Y.; Yan, H.; Zhang, Q.; Gu, W. Densely Isolated FeN<sub>4</sub> Sites for Peroxidase Mimicking. *ACS Catalysis* **2020**, *10* (11), 6422-6429.

[20] Ji, S.; Jiang, B.; Hao, H.; Chen, Y.; Dong, J.; Mao, Y.; Zhang, Z.; Gao, R.; Chen, W.; Zhang, R.; Liang, Q.; Li, H.; Liu, S.; Wang, Y.; Zhang, Q.; Gu, L.; Duan, D.; Liang, M.; Wang, D.; Yan, X.; Li, Y. Matching the Kinetics of Natural Enzymes with a Single-Atom Iron Nanozyme. *Nat. Catal.* **2021**, *4*, 407–417.

[21] Wei, X.; Song, S.; Song, W.; Xu, W.; Jiao, L.; Luo, X.; Wu, N.; Yan, H.; Wang, X.; Gu, W.; Zheng, L.; Zhu, C. Fe<sub>3</sub>C-Assisted Single Atomic Fe Sites for Sensitive Electrochemical Biosensing. *Anal. Chem.* **2021**, *93*, 5334–5342.

[22] Xu, W.; Song, W.; Kang, Y.; Jiao, L.; Wu, Y.; Chen, Y.; Cai, X.; Zheng, L.; Gu, W.; Zhu, C. Axial Ligand-Engineered Single-Atom Catalysts with Boosted Enzyme-Like Activity for Sensitive Immunoassay. *Anal. Chem.* **2021**, *93* (37), 12758–12766.

[23] Zhu, Y.; Wang, W.; Cheng, J.; Qu, Y.; Dai, Y.; Liu, M.; Yu, J.; Wang, C.; Wang, H.; Wang, S.; Zhao, C.; Wu, Y.; Liu, Y. Stimuli-Responsive Manganese Single-Atom Nanozyme for Tumor Therapy via Integrated Cascade Reactions. *Angew. Chem., Int. Ed.* **2021**, *60* (17), 9480–9488.

[24] Zhang, C.; Chen, C.; Zhao, D.; Kang, G.; Liu, F.; Yang, F.; Lu, Y.; Sun, J. Multienzyme Cascades Based on Highly Efficient Metal–Nitrogen–Carbon Nanozymes for Construction of Versatile Bioassays. *Anal. Chem.* **2022**, *94* (8), 3485-3493.

[25] Liu, W.; Chen, Q.; Wu, J.; Zhang, F.; Han, L.; Liu, J.; Zhang, H.; Hao, Z.; Shi, E.; Sun, Y. Asymmetric Coordination of Iron Single-Atom Nanozymes with Efficient Self-Cascade Catalysis for Ferroptosis Therapy. *Adv. Funct. Mater.* **2024**, *34* (14), 2312308.

[26] Zhao, C.; Xiong, C.; Liu, X.; Qiao, M.; Li, Z.; Yuan, T.; Wang, J.; Qu, Y.; Wang, X.; Zhou, F. Unraveling the enzyme-like activity of heterogeneous single atom catalyst.

*Chem. Commun.* **2019**, *55* (16), 2285–2288.

[27] Wu, Y.; Wu, J.; Jiao, L.; Xu, W.; Wang, H.; Wei, X.; Gu, W.; Ren, G.; Zhang, N.; Zhang, Q.; Huang, L.; Gu, L.; Zhu, C. Cascade Reaction System Integrating Single-Atom Nanozymes with Abundant Cu Sites for Enhanced Biosensing. *Anal. Chem.* **2020**, *92*(5), 3373–3379.

[28] Xu, W.; Jiao, L.; Yan, H.; Wu, Y.; Chen, L.; Gu, W.; Du, D.; Lin, Y.; Zhu, C. Glucose Oxidase-Integrated Metal–Organic Framework Hybrids as Biomimetic Cascade Nanozymes for Ultrasensitive Glucose Biosensing. *ACS Appl. Mater. Interfaces* **2019**, *11* (25), 22096–22101.

[29] Wu, Y.; Wu, J.; Jiao, L.; Xu, W.; Wang, H.; Wei, X.; Gu, W.; Ren, G.; Zhang, N.; Zhang, Q.; et al. Cascade Reaction System Integrating Single-Atom Nanozymes with Abundant Cu Sites for Enhanced Biosensing. *Anal. Chem.* **2020**, *92* (4), 3373–3379.

[30] Xu, W.; Jiao, L.; Yan, H.; Wu, Y.; Chen, L.; Gu, W.; Du, D.; Lin, Y.; Zhu, C. Glucose Oxidase-Integrated Metal–Organic Framework Hybrids as Biomimetic Cascade Nanozymes for Ultrasensitive Glucose Biosensing. *ACS Appl. Mater. Interfaces* **2019**, *11* (25), 22096–22101.

[31] Xu, B.; Li, S.; Zheng, L.; Liu, Y.; Han, A.; Zhang, J.; Huang, Z.; Xie, H.; Fan, K.; Gao, L. A Bioinspired Five-Coordinated Single-Atom Iron Nanozyme for Tumor Catalytic Therapy. *Adv. Mater.* **2022**, *34* (15), 2107088.

[32] Zhao, C.; Xiong, C.; Liu, X.; Qiao, M.; Li, Z.; Yuan, T.; Wang, J.; Qu, Y.; Wang, X.; Zhou, F.; Xu, Q.; Wang, S.; Chen, M.; Wang, W.; Li, Y.; Yao, T.; Wu, Y.; Li, Y. Unraveling the enzyme-like activity of heterogeneous single atom catalyst. *Chem. Commun.* **2019**, *55* (15), 2285–2288.

[33] Wu, Y.; Wu, J.; Jiao, L.; Xu, W.; Wang, H.; Wei, X.; Gu, W.; Ren, G.; Zhang, N.; Zhang, Q.; Huang, L.; Gu, L.; Zhu, C. Cascade Reaction System Integrating Single-Atom Nanozymes with Abundant Cu Sites for Enhanced Biosensing. *Anal. Chem.* **2020**, *92*(5), 3373–3379.

[34] Zhang, X.; Qiao, J.; Liu, W.; Qi, L. Boosting the peroxidase-like activity of gold nanoclusters for the colorimetric detection of oxytetracycline in rat serum. *Analyst* **2021**, *146*(16), 5061–5066.

- [35] Zhang, T.; Zhang, Z.; Sun, S.; Qu, X.; Qiu, Y.; Kai, T.; Wu, P.; Ding, P. Multi-functional copper-manganese Nanozyme-Driven integrated platform for Fluorescence/Colorimetric Dual-Mode Detection, catalytic degradation of oxytetracycline and antibacterial disinfection. *Sep. Purif. Technol.* **2025**, *374*, 133751.
- [36] Liu, C.; Li, J.; Zuo, M.; Ng, D. H. L.; Yang, X.; Gao, S.; Lan, Z. Synthesis of carbon dot LDHs@MnO<sub>2</sub> tubular magnetic micromotors for detection and degradation of oxytetracycline. *Sep. Purif. Technol.* **2024**, *340*, 126650.
- [37] Gogoi, D.; Hazarika, C.; Neog, G.; Mridha, P.; Bora, H. K.; Das, M. R.; Szunerits, S.; Boukherroub, R. Borophene Quantum Dots as Novel Peroxidase-Mimicking Nanozyme: A Dual-Mode Assay for the Detection of Oxytetracycline and Tetracycline Antibiotics. *ACS Appl. Mater. Interfaces* **2024**, *16*(11), 14645–14660.
- [38] Li, Y.; Kuang, Z.; Li, X.; He, L.; Yang, Z.; Yang, J.; Wang, X. Photoresponsive N-CDs@Zr luminescent nanozyme for dual-mode optical detection of oxytetracycline. *Microchem. J.* **2025**, *212*, 113500.
- [39] Fu, Y.; Huang, L.; Zhao, S.; Xing, X.; Lan, M.; Song, X. A Carbon Dot-Based Fluorometric Probe for Oxytetracycline Detection Utilizing a Förster Resonance Energy Transfer Mechanism. *Spectrochim. Acta, Part A* **2020**, *246*, 118947.
- [40] Wu, C.; Li, J.; Song, J.; Guo, H.; Bai, S.; Lu, C.; Peng, H.; Wang, X. Novel Colorimetric Detection of Oxytetracycline in Foods by Copper Nanozyme. *Food Chem.* **2024**, *430*, 137040.
- [41] Wang, X.; Wang, X. UIO-66-NH<sub>2</sub> Based Fluorescent Sensing for Detection of Tetracyclines in Milk. *RSC Adv.* **2022**, *12* (36), 23427–23436.
- [42] Yan, Y.; Liu, J. H.; Li, R. S.; Li, Y. F.; Huang, C. Z.; Zhen, S. J. Carbon Dots Synthesized at Room Temperature for Detection of Tetracycline Hydrochloride. *Anal. Chim. Acta* **2019**, *1063*, 144–151.
